# Supplementary material
Source: PubMed Central journal article supplement (PMC2626748)
Supplement: 0811697106_0811697106SI.pdf [file 0811697106_0811697106SI.pdf]

# Supporting Information

Li et al. 10.1073/pnas.0811697106

## SI Materials and Methods

**DNA and Genetic Procedures.** DNA manipulations were carried out as described in Sambrook *et al.* (1). Transformation of bacterial strains was routinely done by electroporation (2), by using Gene Pulser Xcell System (Bio-Rad). Transformants containing *Asd*<sup>+</sup> plasmids were selected on LB agar plates without DAP. Only clones containing the recombinant plasmids were able to grow under these conditions. PCR amplification was used to obtain DNA fragments for verification of chromosomal deletion mutations.

SDS/PAGE and immunoblot analyses protein samples were boiled for 5 min and subsequently separated by SDS/PAGE. For immunoblotting, proteins separated by SDS/PAGE were transferred to nitrocellulose membranes. After blocking membranes with 3% skim milk in 10 mM Tris-0.9% NaCl (pH 7.4), pneumococcal surface protein A (PspA) was detected with rabbit polyclonal antibody specific for PspA (University of Alabama at Birmingham), followed by the addition of an AP-conjugated goat anti-rabbit IgG (Sigma). Immunoreactive bands were visualized by the addition of BCIP/NBT solution (Sigma). The reaction was stopped after 2 min by washing with large volumes of deionized water several times.

**ELISA.** ELISAs were performed as previously described (3). Briefly, polystyrene 96-well flat-bottom microtiter plates (Dynatech Laboratories) were coated with 100 ng/well of either LPS, *Salmonella* outer membrane protein (SOMP), or purified rPspA. Antigens suspended in sodium carbonate-bicarbonate coating buffer (pH 9.6) were applied in 100- $\mu$ L volumes to each well. Plates were incubated overnight at 4 °C. Free binding sites were blocked with PBS (pH 7.4), containing 0.1% Tween 20 (PBS-T) and 1% BSA. A 100- $\mu$ L volume of series diluted sample was added to individual wells in triplicate and incubated for 1 h at 37 °C. Plates were treated with biotinylated goat anti-mouse IgG, IgG1, or IgG2a (Southern Biotechnology). Wells were developed with streptavidin-alkaline phosphatase conjugate (Southern Biotechnology), followed by *p*-nitrophenylphosphate substrate (Sigma) in diethanolamine buffer (pH 9.8). Color development (absorbance) was recorded at 405 nm by using an automated ELISA plate reader (model EL311SX; Biotek). Absorbance readings 0.1 higher than PBS control values were considered positive reactions.

**IL-4 and IFN- $\gamma$  ELISPOT.** ELISPOTs were performed as previously described (4). Briefly, PVDF membrane plates (Millipore) were pretreated with EtOH, washed with sterile H<sub>2</sub>O, and coated with 100  $\mu$ L of mAbs IL-4 or IFN- $\gamma$  (BD PharMingen) at 2  $\mu$ g/mL, in PBS overnight at 4 °C. The wells were washed with PBS and blocked with RPMI with 10% FCS. After that, 50  $\mu$ L cell medium (RPMI-1640 supplemented with 10% FCS, 2 mM l-glutamine, 100 IU/mL penicillin, and streptomycin and 1% Hepes) and 50  $\mu$ L of cells (100,000 per well) in cell medium with or without stimulation with rPspA at 5  $\mu$ g/ml were added per well and incubated in the plates overnight in 5% CO<sub>2</sub> at 37 °C. The next day, the cell suspensions were discarded and the plates washed with PBS-T. Biotinylated mAb IL-4 or IFN- $\gamma$  (BD PharMingen) at 0.5  $\mu$ g/mL in PBS-T with 1% FCS was added and incubated at room temperature for 2 h. After washing with PBS-T, 100  $\mu$ L/well of avidin peroxidase diluted 1:1,000 (vol/vol) in PBS-T containing 1% FCS were added followed by incubation for 1 h at room temperature. AEC (3-amin-9-ethycarbazole) substrate was prepared according to manufacturer's specifications (Vector Laboratories), and after washing with PBS-T, 100  $\mu$ L of substrate was added per well. Spots were developed for 15 min at room temperature. Plates were dried and analyzed by using an automated CTL ELISPOT Reader System (Cellular Technology).

**Measurement of Cytokine Concentrations.** Cytokine concentrations were determined by using the Bio-Plex Protein Array System (Bio-Rad) (5). Cytokine-specific antibody-coated beads (Bio-Rad) were used for these experiments. Serum samples were incubated with antibody-coupled beads for 1 h with continuous shaking. The beads were washed 3 times with wash buffer to remove unbound protein and then incubated with biotinylated detection cytokine-specific antibody for 1 h with continuous shaking. The beads were washed once more and were then incubated with streptavidin-phycoerythrin for 10 min. After incubation, the beads were washed and resuspended in assay buffer, and the constituents of each well were drawn up into the flow-based Bio-Plex Suspension Array System, which identifies each different color bead as a population of protein and quantifies each protein target based on secondary antibody fluorescence. Cytokine concentrations were automatically calculated by Bio-Plex Manager software by using a standard curve derived from a recombinant cytokine standard. Multiple readings were made on each bead set.

1. Sambrook J, Russell DW (2001) *Molecular Cloning: A Laboratory Manual* (Cold Spring Harbor Lab Press, Plainview, NY).
2. O'Callaghan D, Charbit A (1990) High efficiency transformation of *Salmonella typhimurium* and *Salmonella typhi* by electroporation. *Mol Gen Genet* 223:156–158.
3. Kang HY, Srinivasan J, Curtiss R, III (2002) Immune responses to recombinant pneumococcal PspA antigen delivered by live attenuated *Salmonella enterica* serovar Typhimurium vaccine. *Infect Immun* 70:1739–1749.
4. Sedgwick JD, Holt PG (1983) A solid-phase immunoenzymatic technique for the enumeration of specific antibody-secreting cells. *J Immunol Methods* 57:301–309.

5. Kerr JR, et al. (2004) Circulating cytokines and chemokines in acute symptomatic parvovirus B19 infection: Negative association between levels of pro-inflammatory cytokines and development of B19-associated arthritis. *J Med Virol* 74:147–155.
6. Curtiss R, III, et al. (2007) in *Virulence Mechanisms of Bacterial Pathogens*, ed Brogden K, et al. (American Society for Microbiology, Washington, DC), pp 297–313.
7. Bollen WS, et al. (2008) Presence of wild-type and attenuated *Salmonella enterica* strains in brain tissues following inoculation of mice by different routes. *Infect Immun* 76:3268–3272.
8. Briles DE, et al. (1996) PspA, a protection-eliciting pneumococcal protein: Immunogenicity of isolated native PspA in mice. *Vaccine* 14:858–867.

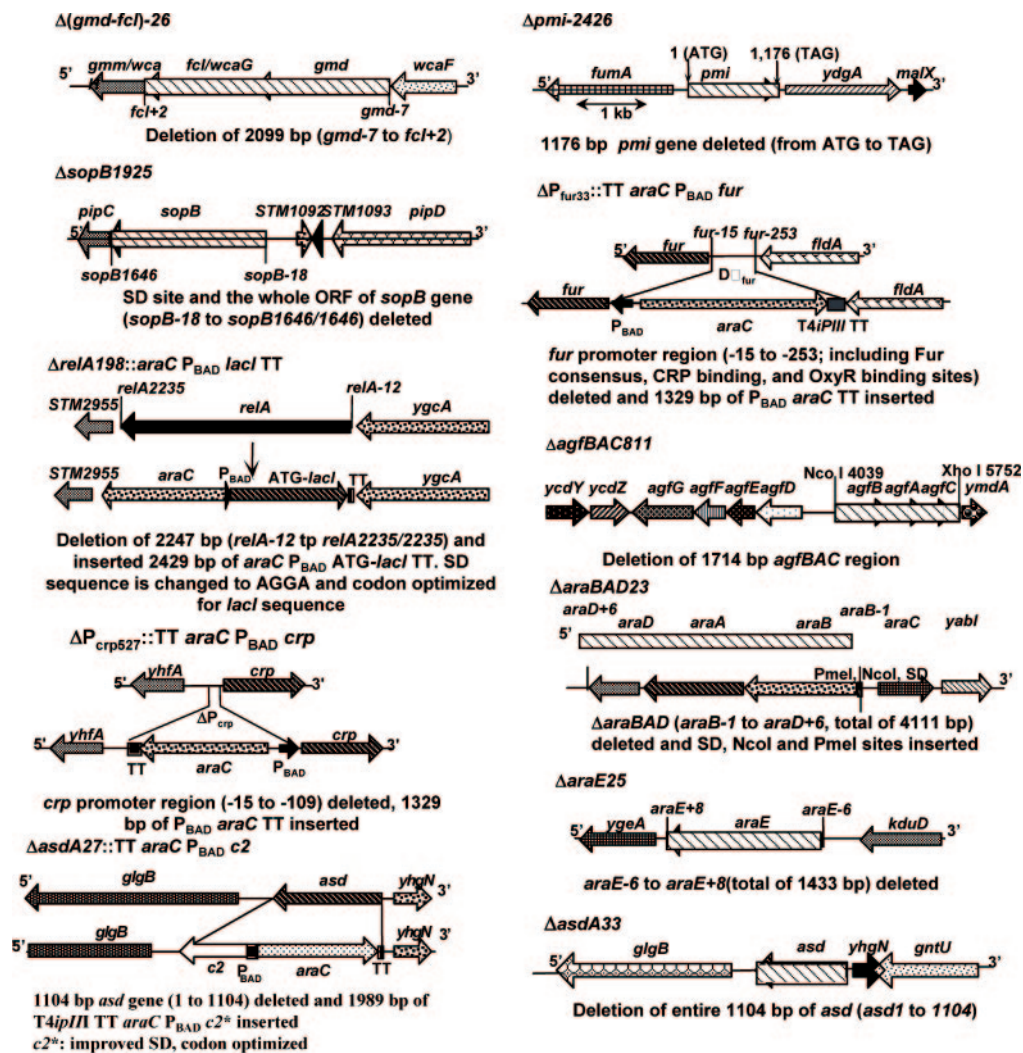

Fig. S1. Schematic representations of the mutations in *Salmonella enterica* strains  $\chi$ 9088 and  $\chi$ 9558.

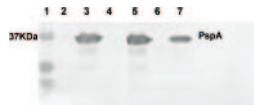

**Fig. S2.** Western blotting showing the synthesis of PspA (Rx1) in different *Salmonella typhimurium* mutants. Strains were grown in LB broth overnight at 37 °C. Plasmid-containing  $\chi$ 9088 and  $\chi$ 9558 cultures were supplemented with 0.2% mannose or 0.2% mannose and 0.05% arabinose, respectively. Equal numbers of cells from each culture were pelleted, suspended in loading buffer, and boiled. Equal volumes of cell lysates were subjected to SDS/PAGE, transferred to nitrocellulose, and probed with a polyclonal antibody specific for PspA lanes: molecular mass markers (positions are indicated in kilodaltons) (lane 1);  $\chi$ 8133(pYA3493) (lane 2);  $\chi$ 8133(pYA3634) (lane 3);  $\chi$ 9088(pYA3493) (lane 4);  $\chi$ 9088(pYA3634) (lane 5);  $\chi$ 9558(pYA3493) (lane 6);  $\chi$ 9558(pYA3634) (lane 7). Due to the presence of arabinose in LB broth, the PspA expression of  $\chi$ 9558(pYA3634) has been partially repressed.



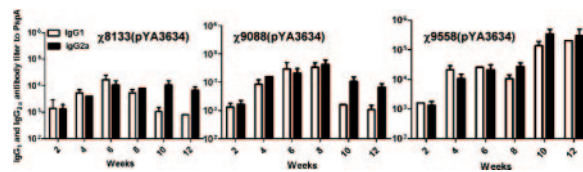

**Table S1. Bacterial strains and plasmids used in this study**

| Strain or plasmid        | Genotype or relevant characteristics                                                                                                                                                                                                               | Source or ref. |
|--------------------------|----------------------------------------------------------------------------------------------------------------------------------------------------------------------------------------------------------------------------------------------------|----------------|
| <b>Strains</b>           |                                                                                                                                                                                                                                                    |                |
| <i>S. typhimurium</i>    |                                                                                                                                                                                                                                                    |                |
| χ8133                    | Δcya-27 Δcrp-27 ΔasdA16                                                                                                                                                                                                                            | Lab collection |
| χ9088                    | ΔP <sub>fur33</sub> ::TT araC P <sub>BAD</sub> fur Δpmi-2426 Δ(gmd-fcl)-26 ΔasdA33                                                                                                                                                                 | 6              |
| χ9558                    | Δpmi-2426 Δ(gmd-fcl)-26 ΔP <sub>fur81</sub> ::TT araC P <sub>BAD</sub> fur ΔPcrp <sub>527</sub> ::TT araC P <sub>BAD</sub> crp ΔasdA27::TT araC P <sub>BAD</sub> C2 ΔaraE25 ΔaraBAD23 ΔrelA198::araC P <sub>BAD</sub> lacI TT ΔsopB1925 ΔagfBAC811 | 7              |
| χ8868                    | Δpmi-2426 Δ(gmd-fcl)-26                                                                                                                                                                                                                            | Lab collection |
| χ9725                    | ΔasdA33 ΔP <sub>fur81</sub> ::TT araC P <sub>BAD</sub> fur ΔaraBAD23                                                                                                                                                                               | Lab collection |
| χ9872                    | ΔasdA33 Δfur-1 zbf-5123::Tn10                                                                                                                                                                                                                      | Lab collection |
| <i>S. pneumoniae</i> WU2 | Wild-type virulent, encapsulated type 3                                                                                                                                                                                                            | 8              |
| <b>Plasmids</b>          |                                                                                                                                                                                                                                                    |                |
| pYA3493                  | Plasmid Asd <sup>+</sup> ; pBRori β-lactamase signal sequence-based periplasmic secretion plasmid                                                                                                                                                  | 3              |
| pYA3634                  | 0.7-kb DNA encoding the α-helical region of PspA from amino acid 3 to amino acid 286 in pYA3493                                                                                                                                                    | 6              |

**Table S2. Immunization with regulated delayed attenuation *S. typhimurium* vaccine strains stimulates systemic cytokine production**

| Mouse groups              | Cytokine concentration, pg/mL |                 |                 |                 |                 |                 |                 |
|---------------------------|-------------------------------|-----------------|-----------------|-----------------|-----------------|-----------------|-----------------|
|                           | IL-2                          | IL-4            | IL-5            | IL-10           | IL-12           | GM-CSF          | TNF- $\alpha$   |
| BSG                       | 6.5 $\pm$ 0.71                | 13.4 $\pm$ 1.27 | 8.5 $\pm$ 1.41  | 7.8 $\pm$ 1.06  | 15.0 $\pm$ 0.71 | 12.5 $\pm$ 1.41 | 9.9 $\pm$ 0.14  |
| $\chi$ 8133 (pYA3493)     | 7.3 $\pm$ 0.35                | 18.3 $\pm$ 0.35 | 10.2 $\pm$ 1.20 | 8.5 $\pm$ 0.00  | 17.7 $\pm$ 0.92 | 13.8 $\pm$ 1.06 | 11.3 $\pm$ 0.35 |
| $\chi$ 8133* (pYA3634)    | 12.0 $\pm$ 1.27               | 27.7 $\pm$ 5.44 | 21.8 $\pm$ 3.89 | 21.7 $\pm$ 3.04 | 42.3 $\pm$ 9.55 | 28.0 $\pm$ 2.12 | 32.3 $\pm$ 3.18 |
| $\chi$ 9088 (pYA3493)     | 9.5 $\pm$ 0.00                | 27.4 $\pm$ 1.56 | 17.0 $\pm$ 0.00 | 14.0 $\pm$ 1.41 | 29.9 $\pm$ 3.39 | 20.9 $\pm$ 0.57 | 18.8 $\pm$ 1.77 |
| $\chi$ 9088* (pYA3634)    | 11.5 $\pm$ 0.71               | 37.3 $\pm$ 1.41 | 24.5 $\pm$ 2.12 | 22.5 $\pm$ 0.71 | 49.7 $\pm$ 1.20 | 31.7 $\pm$ 3.75 | 31.0 $\pm$ 2.12 |
| $\chi$ 9558 (pYA3493)     | 11.8 $\pm$ 0.35               | 34.8 $\pm$ 1.06 | 30.5 $\pm$ 2.12 | 25.8 $\pm$ 1.06 | 53.3 $\pm$ 1.41 | 39.2 $\pm$ 1.02 | 37.8 $\pm$ 1.06 |
| $\chi$ 9558*,** (pYA3634) | 15.0 $\pm$ 1.41               | 46.3 $\pm$ 1.06 | 32.0 $\pm$ 1.41 | 26.5 $\pm$ 1.48 | 59.0 $\pm$ 8.13 | 39.8 $\pm$ 7.78 | 39.7 $\pm$ 3.32 |

\*, compared with BSG group, significantly higher overall systemic cytokine production,  $P < 0.01$ . \*\*, compared with  $\chi$ 8133(pYA3634) group, significantly higher overall systemic cytokine production,  $P < 0.05$ .
